# Supplementary material for: Potential Role of Rainbow Trout Erythrocytes as Mediators in the Immune Response Induced by a DNA Vaccine in Fish
Source: MDPI journal article supplement (doi:10.3390/vaccines7030060), 2019-07-03

**Figure S1:** FACS single-cell sorting of HK-RBCs and PB-RBCs. A) Representative dotplot and histogram showing selected population for FACS single-cell sorted HK-RBCs using BD FACSJazz™ cell sorter. B)  $10^2$  purified HK-RBCs and C)  $10^6$  purified PB-RBCs stained with SYTO RNaselect and purified by FACS using BD FACSJazz™ cell sorter for transcriptome analysis. Brightfield and FITC images were taken at 10× magnification. D) RBCs after Ficoll gradient purification for proteome analysis. The brightfield image was taken at 20× magnification. Images were taken with the IN Cell Analyzer 6000 Cell Imaging system.

A

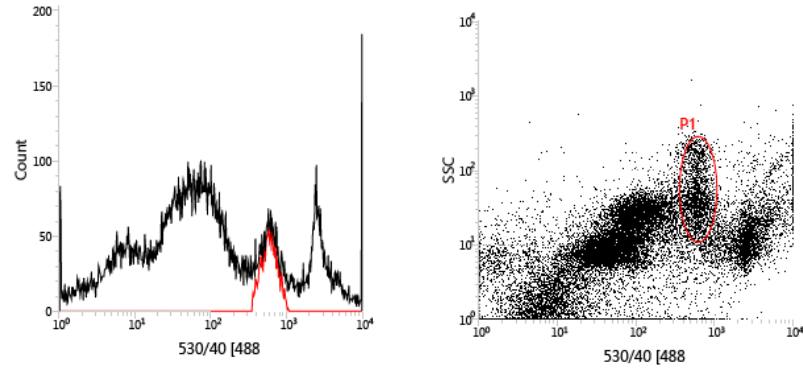

B

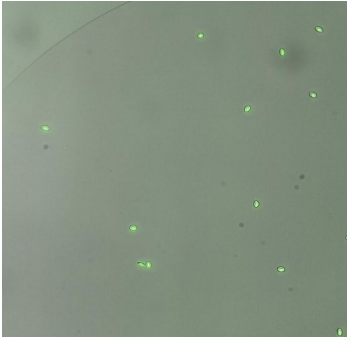

C

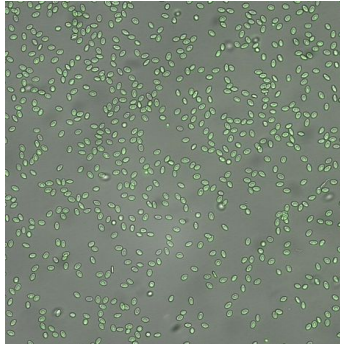

D

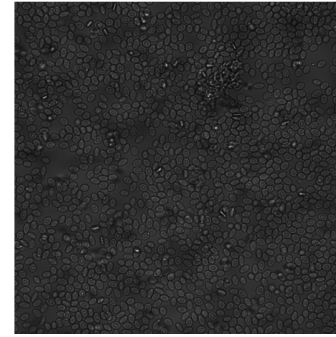

Supplement: s1 [file s1]
